# Supplementary material
Source: PubMed Central journal article supplement (PMC4242098)
Supplement: NIHMS61736-supplement-si20061020_120.pdf [file NIHMS61736-supplement-si20061020_120.pdf]

## Supporting Information

### TOPOMIMETICS OF AMPHIPATHIC $\beta$ -SHEET AND HELIX-FORMING BACTERICIDAL PEPTIDES NEUTRALIZE LIPOPOLYSACCHARIDE ENDOTOXINS

*Xuemei Chen, Ruud P.M. Dings, Irina Nesmelova, Stefan Debbert, Judith R. Haseman,  
Jacques Maxwell, Thomas R. Hoye, Kevin H. Mayo*

Contents: Full spectroscopic characterization data of calixarene derivatives **2–4, 6–12, 15, 19–23.**

Full spectroscopic characterization data of calixarene derivatives **2–4**, **6–12**, **15**, **19–23**.

**Tetra-amide 2:**  $^1\text{H}$  NMR (500 MHz,  $\text{CDCl}_3$ )  $\delta$  7.67 (br t,  $J = 6.0$  Hz, 4H), 6.77 (s, 8H), 4.52 (s, 8H), 4.49 (d,  $J = 13.0$ , 4H), 3.45 (br dt,  $J = 6.5$ , 6.0 Hz, 8H), 3.23 (d,  $J = 13.0$  Hz, 4H), 2.47 (t,  $J = 6.5$  Hz, 8H), 2.23 (s, 24 H), 1.07 (s, 36 H);  $^{13}\text{C}$  NMR (125 MHz)  $\delta$  170.0 (4C), 153.2 (4C), 145.8 (4C), 132.9 (8C), 125.9 (8C), 74.8 (4C), 67.6 (4C), 58.3 (4C), 45.5 (8C), 37.3 (4C), 34.1 (4C), 31.5 (12C); HRMS (ESI)  $m/z$  calcd for  $\text{C}_{68}\text{H}_{105}\text{N}_8\text{Na}_1\text{O}_8$  ( $\text{M}+\text{H}+\text{Na}$ ) $^{2+}$  592.3977, found 592.3992.

**Tetra-amine 3:**  $^1\text{H}$  NMR (500 MHz,  $\text{CDCl}_3$ )  $\delta$  7.58 (br t,  $J = 6.4$  Hz, 4H), 6.42 (s, 8H), 4.46 (s, 8H), 4.41 (d,  $J = 13.8$  Hz, 4H), 3.42 (dt,  $J = 6.9$ , 6.4 Hz, 8H), 3.15 (d,  $J = 13.8$  Hz, 4H), 2.44 (t,  $J = 6.9$  Hz, 8H), 2.24 (t,  $J = 7.4$  Hz, 8H), 2.20 (s, 24 H), 1.44 (app sextet,  $J \approx 7$  Hz, 8H), 0.84 (t,  $J = 7.2$  Hz, 12H);  $^{13}\text{C}$  NMR (125 MHz,  $\text{CDCl}_3$ )  $\delta$  169.8 (4C), 153.8 (4C), 137.0 (4C), 133.6 (8C), 128.8 (8C), 74.4 (4C), 58.2 (4C), 45.5 (8C), 37.4 (4C), 37.2 (4C), 31.3 (4C), 24.6 (4C), 13.8 (4C); HRMS (ESI)  $m/z$  calcd for  $\text{C}_{64}\text{H}_{97}\text{N}_8\text{O}_8$  ( $\text{M}+\text{H}$ ) $^+$  1105.7424, found 1105.7471.

**Tetra-amine 4:**  $^1\text{H}$  NMR (500 MHz,  $\text{CDCl}_3$ )  $\delta$  7.42 (t,  $J = 5.7$  Hz, 2H), 7.05 (s, 2H), 6.94 (s, 2H), 6.70 (t,  $J = 5.6$  Hz, 1H), 6.66 (d,  $J = 2.0$  Hz, 2H), 6.40 (d,  $J = 2.0$  Hz, 2H), 5.31 (t,  $J = 5.9$  Hz, 1H), 4.36 (d,  $J = 14.1$  Hz, 2H), 4.24 (d,  $J = 13.2$  Hz, 2H), 4.11 $^+$  (s, 2H), 4.11 $^-$  (d,  $J = 14.1$  Hz, 2H), 4.08 (s, 2H), 3.82 (d,  $J = 15.1$  Hz, 2H), 3.62 (d,  $J = 15.1$  Hz, 2H), 3.52 (ddt,  $J = 13.3$ , 6.6, 6.6 Hz, 2H), 3.37 (ddt,  $J = 13.3$ , 6.5, 5.3 Hz, 2H), 3.18 (d,  $J = 13.2$ , 2H), 3.09 (dt,  $J = 6.4$ , 5.8 Hz, 2H), 2.97 (dt,  $J = 7.7$ , 6.0 Hz, 2H), 2.58 (t,  $J = 8.8$  Hz, 2H), 2.56 (t,  $J = 8.5$  Hz, 2H), 2.49 (t,  $J = 6.7$  Hz, 4H), 2.30-2.10 (m, 8H), 2.26 (s, 6H), 2.24 (s, 12H), 2.15 (s, 6H), 1.66 (m, 4H), 1.40 (app sextet,  $J = 7$  Hz, 4H), 0.99 (t,  $J = 7.2$  Hz, 3H), 0.96 (t,  $J = 7.2$  Hz, 3H), 0.83 (t,  $J = 7.4$  Hz, 6H);  $^{13}\text{C}$  NMR (125 MHz,  $\text{CDCl}_3$ )  $\delta$  169.8 (1C), 169.0 (2C), 168.6 (1C), 153.2 (2C), 152.7 (1C), 152.0 (1C), 138.1 (1C), 137.9 (1C), 137.4 (2C), 135.3 (2C), 133.5 (2C), 132.9 (2C), 131.7 (2C), 130.3 (2C), 129.6 (2C), 129.0 (2C), 128.9 (2C), 73.6 (2C), 72.0 (1C), 69.8 (1C), 58.3 (2C), 58.3 (1C), 58.2 (1C), 45.9 (2C), 45.6 (4C), 45.4 (2C), 37.9 (1C), 37.8 (2C), 37.6 $^+$  (1C), 37.6 $^-$  (2C), 37.3 (2C), 37.1 (1C), 37.0 (1C), 31.6 (2C), 24.8 $^+$  (2C), 24.8 $^-$  (1C), 24.8 $^-$  (1C), 14.4 (1C), 14.1 (2C), 14.0 (1C); HRMS (ESI)  $m/z$  calcd for  $\text{C}_{64}\text{H}_{97}\text{N}_8\text{O}_8$  ( $\text{M}+\text{H}$ ) $^+$  1105.7424, found 1105.7514.

**Tetra-amine 6:**  $^1\text{H}$  NMR (500 MHz,  $\text{CDCl}_3$ )  $\delta$  7.94 (br t,  $J = 6.5$  Hz, 2H), 7.33 (br t,  $J = 6.5$  Hz, 2H), 6.73 (s, 4H), 6.17 (s, 4H), 5.65 (ddt,  $J = 17.1$ , 10.5, 6.8 Hz, 2H), 4.91 (dd,  $J = 10.5$ , 1.4 Hz, 2H), 4.85 (dd,  $J = 17.1$ , 1.4 Hz, 2H), 4.80 (s, 2H), 4.65 (s, 2H), 4.61 (s, 4H), 4.45 (d,  $J = 13.5$  Hz, 4H), 4.33 (s, 4H), 3.50 (dt,  $J \approx 6$ , 6 Hz, 4H), 3.37 (dt,  $J \approx 6$ , 6 Hz, 4H), 3.17 (d,  $J = 14.7$  Hz, 4H), 3.16 (s, 4H), 2.86 (d,  $J = 6.8$  Hz, 4H), 2.52 (t,  $J = 6.4$  Hz, 4H), 2.40 (t,  $J = 6.4$  Hz, 4H), 2.24 (s,

12H), 2.19 (s, 12H), 1.68 (s, 6H);  $^{13}\text{C}$  NMR (125 MHz,  $\text{CDCl}_3$ )  $\delta$  170.2 (2C), 169.5 (2C), 154.9 (2C), 153.4 (2C), 145.9 (2C), 137.8 (2C), 134.9 (4C), 134.4 (2C), 134.3 (2C), 132.9 (4C), 130.1 (4C), 128.5 (4C), 115.4 (2C), 111.6 (2C), 74.7 (2C), 74.2 (2C), 58.3 (2C), 58.1 (2C), 45.5 (4C), 45.4 (4C), 44.1 (2C), 39.6 (2C), 37.1 (2C), 37.1 (2C), 31.3 (4C), 22.3 (2C); HRMS (ESI)  $m/z$  calcd for  $\text{C}_{66}\text{H}_{93}\text{N}_8\text{O}_8$  (M+H) $^+$  1125.7116, found 1125.7213.

**Tetra-amine 7:**  $^1\text{H}$  NMR (500 MHz,  $\text{CDCl}_3$ )  $\delta$  7.87 (t,  $J = 6.0$  Hz, 2H), 7.36 (t,  $J = 5.9$  Hz, 2H), 6.63 (s, 4H), 6.20 (s, 4H), 4.58 (s, 4H), 4.43 (d,  $J = 13.9$  Hz, 4H), 4.36 (s, 4H), 3.48 (td,  $J \approx 7, 6$  Hz, 4H), 3.38 (td,  $J \approx 6, 6$  Hz, 4H), 3.15 (d,  $J = 13.9$  Hz, 4H), 2.49 (t,  $J = 6.6$  Hz, 4H), 2.39 (t,  $J = 6.2$  Hz, 4H), 2.28 (d,  $J = 2.7$  Hz, 4H), 2.23 (s, 12H), 2.18 (s, 12H), 2.06 (t,  $J = 7.0$  Hz, 4H), 1.78 (m, 2H), 1.30 (tq,  $J = 7.5, 7.0$  Hz, 4H), 0.87 (d,  $J = 6.8$  Hz, 12H), 0.78 (t,  $J = 7.5$  Hz, 6H);  $^{13}\text{C}$  NMR (125 MHz,  $\text{CDCl}_3$ )  $\delta$  170.3 (2C), 169.7 (2C), 154.4 (2C), 153.1 (2C), 137.1 (2C), 136.2 (2C), 134.4 (4C), 132.7 (4C), 130.1 (4C), 128.4 (4C), 74.7 (2C), 74.2 (2C), 58.3 (2C), 58.1 (2C), 45.4 (4C), 45.4 (4C), 44.9 (2C), 37.4 (2C), 37.1 (2C), 37.1 (2C), 31.3 (4C), 30.7 (2C), 24.5 (2C), 22.4 (4C), 14.0 (2C); HRMS (ESI)  $m/z$  calcd for  $\text{C}_{66}\text{H}_{101}\text{N}_8\text{O}_8$  (M+H) $^+$  1133.7742, found 1133.7813.

**Tetra-amide 8:**  $^1\text{H}$  NMR (300 MHz,  $\text{CDCl}_3$ )  $\delta$  6.56 (t,  $J = 5.5$  Hz, 4H), 6.45 (s, 8H), 4.35 (d,  $J = 13.2$  Hz, 4H), 3.87 (t,  $J = 7.2$  Hz, 8H), 3.32 (td,  $J = 6, 6$  Hz, 8H), 3.40 (d,  $J = 13.2$  Hz, 4H), 5.27 (br t,  $J = 7.8$  Hz, 8H), 2.41 (t,  $J = 6.1$  Hz, 8H), 2.27 (br t,  $J = 7.8$  Hz, 8H), 2.22 (s, 24H), 1.79 (m, 12H), 0.95 (d,  $J = 7.0$  Hz, 24H);  $^{13}\text{C}$  NMR (75 MHz,  $\text{CDCl}_3$ )  $\delta$  173.0 (4C), 154.9 (4C), 134.9 (8C), 134.3 (4C), 128.0 (8C), 73.8 (4C), 58.3 (4C), 45.4 (8C), 39.1 (4C), 38.8 (4C), 37.2 (4C), 31.3 (4C), 31.2 (4C), 25.6 (4C), 23.0 (8C); HRMS (ESI)  $m/z$  calcd for  $\text{C}_{76}\text{H}_{122}\text{N}_8\text{O}_8$  (M+2H) $^{2+}$  637.4693, found 637.4686.

**Di-amide 9:**  $^1\text{H}$  NMR (500 MHz,  $\text{CD}_3\text{OD}$ )  $\delta$  7.14 (d,  $J = 7.5$  Hz, 4H), 6.93 (d,  $J = 7.5$  Hz, 4H), 6.73 (t,  $J = 7.5$  Hz, 4H), 4.62 (s, 4H), 4.23 (d,  $J = 13.0$  Hz, 4H), 3.61 (t,  $J = 6.6$  Hz, 4H), 3.51 (d,  $J = 13.0$  Hz, 4H), 2.65 (t,  $J = 6.6$  Hz, 4H), 2.29 (s, 12H);  $^{13}\text{C}$  NMR (75 MHz,  $\text{CD}_3\text{OD}$ )  $\delta$  170.6 (2C), 153.2 (2C), 152.4 (2C), 134.3 (4C), 130.6 (4C), 130.1 (4C), 128.9 (4C), 127.4 (2C), 121.4 (2C), 75.4 (2C), 59.2 (2C), 45.5 (4C), 37.7 (2C), 32.3 (4C); HRMS (ESI)  $m/z$  calcd for  $\text{C}_{40}\text{H}_{49}\text{N}_4\text{O}_6$  (M+H) $^+$  681.3652, found 681.3628.

**5,11,17,23-Tetra-tert-butyl-25,27-bis(2-guanidinoethoxy)-26,28-dihydroxy calix[4]arene trifluoroacetic acid salt (10):**  $^1\text{H}$  NMR (500 MHz,  $\text{CD}_3\text{OD}$ )  $\delta$  7.19 (s, 4H), 7.02 (s, 4H), 4.26 (d,  $J = 13.2$  Hz, 4H), 4.22 (t,  $J = 5.2$  Hz, 4H), 3.81 (t,  $J = 5.2$  Hz, 4H), 3.48 (d,  $J = 13.2$  Hz, 4H), 1.27 (s, 18H), 1.03 (s, 18H);  $^{13}\text{C}$  NMR (125 MHz,  $\text{CDCl}_3$  and  $\text{CD}_3\text{OD}$ )  $\delta$  157.6 (2C), 148.9 (2C), 148.4 (2C), 148.1 (2C), 143.9 (2C), 132.5 (4C), 127.9 (4C), 126.1 (4C), 125.5 (4C), 74.0 (2C), 41.5 (2C), 34.1 (2C), 33.8 (2C), 31.5 (4C), 31.3 (6C), 30.8 (6C); HRMS (ESI)  $m/z$  calcd for  $\text{C}_{50}\text{H}_{72}\text{N}_6\text{O}_4$  ( $\text{M}+2\text{H}$ ) $^{2+}$  410.2808, found 410.2787.

**25,27-bis(2-guanidinoethoxy)-26,28-dihydroxy calix[4]arene trifluoroacetic acid salt (11):**  $^1\text{H}$  NMR (300 MHz,  $\text{CD}_3\text{OD}$ )  $\delta$  7.14 (d,  $J = 7.3$  Hz, 4H), 6.79 (d,  $J = 7.3$  Hz, 4H), 6.74 (t,  $J = 7.3$  Hz, 2H), 6.60 (t,  $J = 7.3$  Hz, 2H), 4.28 (d,  $J = 12.0$  Hz, 4H), 4.18 (t,  $J = 4.9$  Hz, 4H), 3.81 (t,  $J = 4.9$  Hz, 4H), 3.47 (d,  $J = 13.0$  Hz, 4H);  $^{13}\text{C}$  NMR (75 MHz,  $\text{CD}_3\text{OD}$ )  $\delta$  159.4 (2C), 153.8 (2C), 152.8 (2C), 134.3 (4C), 130.5 (4C), 130.1 (4C), 129.6 (4C), 126.7 (2C), 121.1 (2C), 75.6 (2C), 42.9 (2C), 32.0 (4C); HRMS (ESI)  $m/z$  calcd for  $\text{C}_{34}\text{H}_{39}\text{N}_6\text{O}_4$  ( $\text{M}+\text{H}$ ) $^+$  595.3033, found 595.2967.

**5,11,17,23-Tetra-tert-butyl-25-(2-aminoethoxy)-27-(2-guanidinoethoxy)-26,28-dihydroxy Calix[4]arene trifluoroacetic acid salt (12):**  $^1\text{H}$  NMR (500 MHz,  $\text{CD}_3\text{OD}$ )  $\delta$  7.21 (s, 4H), 6.98 (m, 4H), 4.26 (m, 4H), 4.22 (d,  $J = 13.2$  Hz, 2H), 4.18 (d,  $J = 13.2$  Hz, 2H), 3.80 (m, 2H), 3.61 (m, 2H), 3.50 (d,  $J = 13.2$  Hz, 2H), 3.49 (d,  $J = 13.2$  Hz, 2H), 1.29 (s, 18H), 1.00 (m, 18H); HRMS (ESI)  $m/z$  calcd for  $\text{C}_{49}\text{H}_{70}\text{N}_4\text{O}_4$  ( $\text{M}+2\text{H}$ ) $^{2+}$  389.2698, found 389.2686.

**Tetra-triazole 15:**  $^1\text{H}$  NMR (300 MHz,  $\text{CD}_3\text{OD}$ , 55 °C)  $\delta$  8.44 (s, 4H), 7.94 (s, 4H), 7.04 (s, 8H), 4.59 (s, 8H), 4.57 (d,  $J = 12.0$ , 4H), 4.23 (t,  $J = 7.0$ , 8H), 3.37 (d,  $J = 13.0$  Hz, 4H), 3.31 (t,  $J = 6.6$ , 8H), 2.10 (tt,  $J \approx 7, 7$ , 8H), 1.13 (s, 36H); HRMS (ESI)  $m/z$  calcd for  $\text{C}_{72}\text{H}_{96}\text{N}_{16}\text{Na}_2\text{O}_8$  ( $\text{M}+2\text{Na}$ ) $^{2+}$  679.3696, found 679.3747.

**Tetra-amide 19:**  $^1\text{H}$  NMR (300 MHz,  $\text{CD}_3\text{OD}$ , 55 °C)  $\delta$  6.95 (br s, 8H), 4.59 (s, 8H), 4.50 (d,  $J = 12.9$  Hz, 4 H), 3.64 (t,  $J = 5.9$  Hz, 8H), 3.33 (d,  $J = 12.9$  Hz, 4H), 3.19 (t,  $J = 6.0$  Hz, 8H), 1.13 (s, 36H); HRMS (ESI)  $m/z$  calcd for  $\text{C}_{60}\text{H}_{90}\text{N}_8\text{O}_8$  ( $\text{M}+2\text{H}$ ) $^{2+}$  525.3441, found 525.3446.

**Diamide 20:**  $^1\text{H}$  NMR (300 MHz,  $\text{CDCl}_3$ )  $\delta$  9.00 (br t,  $J = 4.8$  Hz, 2H), 8.16 (s, 2H), 7.10 (d,  $J = 7.5$  Hz, 4H), 6.97 (d,  $J = 7.5$  Hz, 4H), 6.83 (t,  $J = 7.5$  Hz, 2H), 6.75 (t,  $J = 7.5$  Hz, 2H), 4.60 (s, 4H), 4.18 (d,  $J = 13.2$  Hz, 4H), 3.48 (m, 8H), 2.93 (t,  $J = 6.0$  Hz, 4H), 1.82 (br s, 4H);  $^{13}\text{C}$  NMR

(75 MHz, CDCl<sub>3</sub>) δ 168.7 (2C), 152.0 (2C), 151.2 (2C), 133.0 (4C), 129.9 (4C), 129.2 (4C), 127.8 (4C), 126.9 (2C), 120.9 (2C), 75.2 (2C), 42.7 (2C), 41.8 (2C), 31.8 (4C); HRMS (ESI) *m/z* calcd for C<sub>36</sub>H<sub>41</sub>N<sub>4</sub>O<sub>6</sub> (M+H)<sup>+</sup> 625.3026, found 625.2997.

**5,17-Di-(hydroxycabonyl)ethyl-25,27-di-(3-methylbutoxy)-26,28-dihydroxycalix[4]arene**

(21): <sup>1</sup>H NMR (300 MHz, CD<sub>3</sub>OD) δ 6.96 (d, *J* = 7.2 Hz, 4H), 6.95 (s, 4H), 6.75 (t, *J* = 7.2 Hz, 2H), 4.27 (d, *J* = 13.0 Hz, 4H), 4.01 (t, *J* = 6.7 Hz, 4H), 3.37 (d, *J* = 13.0, 4H), 2.77 (t, *J* = 7.6 Hz, 4H), 2.52 (t, *J* = 7.6 Hz, 4H), 2.18 (tq, *J* ≈ 7, 7, 7 Hz, 2H), 1.97 (dt, *J* ≈ 7, 7 Hz, 4H), 1.11 (d, *J* = 6.6 Hz, 12H); <sup>13</sup>C NMR (125 MHz, CD<sub>3</sub>OD) δ 177.3 (2C), 153.6 (2C), 152.7 (2C), 135.1 (4C), 132.7 (2C), 130.1 (4C), 129.6 (4C), 129.5 (4C), 126.3 (2C), 76.5 (2C), 40.3 (2C), 37.5 (2C), 32.3 (4C), 31.5 (2C), 26.1 (2C), 23.4 (4C); HRMS (ESI) *m/z* calcd for C<sub>44</sub>H<sub>51</sub>O<sub>8</sub> (M-H)<sup>-</sup> 707.3589, found 707.3568.

**Di-phosphonic acid 22:** <sup>1</sup>H NMR (500 MHz, CD<sub>3</sub>OD) δ 6.96 (d, *J* = 7.8 Hz, 4H), 6.93 (s, 4H), 6.76 (t, *J* = 7.8 Hz, 2H), 4.29 (d, *J* = 12.6 Hz, 4H), 4.03 (t, *J* = 6.9 Hz, 4H), 3.38 (d, *J* = 12.6 Hz, 4H), 2.57 (t, *J* = 7.0 Hz, 4H), 2.19 (tq, *J* ≈ 7, 6, 6 Hz, 2H), 1.98 (dt, *J* ≈ 7, 7 Hz, 4H), 1.84 (nfom, 4H), 1.61 (nfom including *J*<sub>PH</sub> = 18.0 Hz, 4H), 1.12 (d, *J* = 6.5 Hz, 12H); <sup>13</sup>C NMR (125 MHz, CD<sub>3</sub>OD) δ 153.4 (2C), 152.4 (2C), 135.0 (4C), 133.1 (2C), 129.9 (4C), 129.6 (4C), 129.4 (4C), 126.2 (2C), 76.4 (2C), 40.1 (2C), 36.6 (d, *J*<sub>CP</sub> = 17.1 Hz, 2C), 32.2 (6C), 27.3 (d, *J*<sub>CP</sub> = 137.9 Hz, 2C), 26.0 (2C), 23.4 (4C); <sup>31</sup>P (121 MHz, CD<sub>3</sub>OD) δ 31.0; HRMS (ESI) *m/z* calcd for C<sub>44</sub>H<sub>56</sub>O<sub>10</sub>P<sub>2</sub> (M-2H)<sup>2-</sup> 403.1680, found 403.1682.

**Bis-sulfate 23:** <sup>1</sup>H NMR (500 MHz, CD<sub>3</sub>OD) δ 6.96 (d, *J* = 7.5 Hz, 4H), 6.95 (s, 4H), 6.76 (t, *J* = 7.5 Hz, 2H), 4.27 (d, *J* = 12.8 Hz, 4H), 4.02 (t, *J* = 6.8 Hz, 4H), 3.98 (t, *J* = 6.4 Hz, 4H), 3.36 (d, *J* = 12.8 Hz, 4H), 2.58 (t, *J* = 7.6 Hz, 4H), 2.18 (tq, *J* ≈ 7, 6, 6 Hz, 2H), 1.97 (td, *J* ≈ 7, 7 Hz, 4H), 1.89 (tt, *J* ≈ 7, 6 Hz, 4H), 1.11 (d, *J* = 6.2 Hz, 12H); <sup>13</sup>C NMR (75 MHz, CDCl<sub>3</sub>) δ 153.6 (2C), 152.5 (2C), 135.2 (4C), 133.4 (2C), 130.1 (4C), 129.8 (4C), 129.5 (4C), 126.3 (2C), 76.4 (2C), 68.5 (2C), 40.4 (2C), 32.8 (2C), 32.3 (4C), 32.2 (2C), 26.1 (2C), 23.5 (4C); HRMS (ESI) *m/z* calcd for C<sub>44</sub>H<sub>54</sub>O<sub>12</sub>S<sub>2</sub> (M-2Na)<sup>2-</sup> 419.1534, found 419.1524.
